# Supplementary material
Source: PubMed Central journal article supplement (PMC4310658)
Supplement: ASN.2013121356_ASN2013121356SupplementaryData.pdf [file ASN.2013121356_ASN2013121356SupplementaryData.pdf]

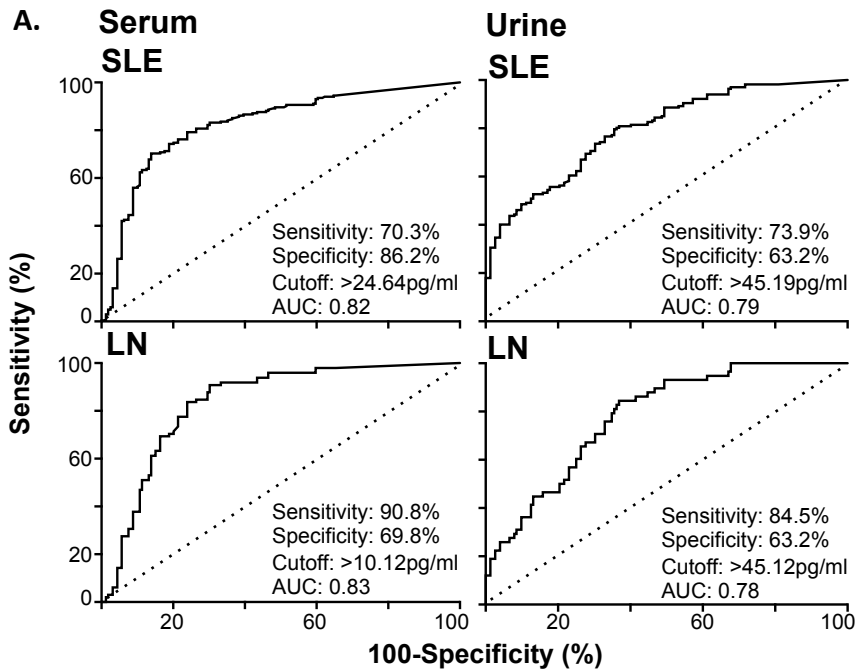

**B. Freeze/thaw does not alter CSF-1 in the serum and urine**

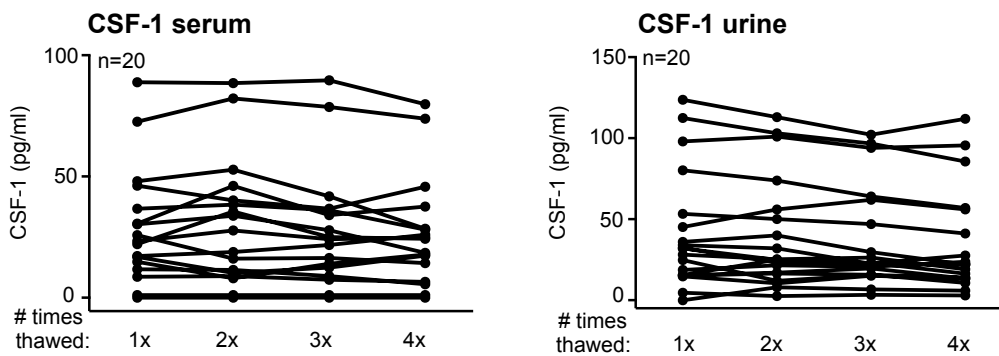

**C. CSF-1 (serum) variability measured at different time-points**

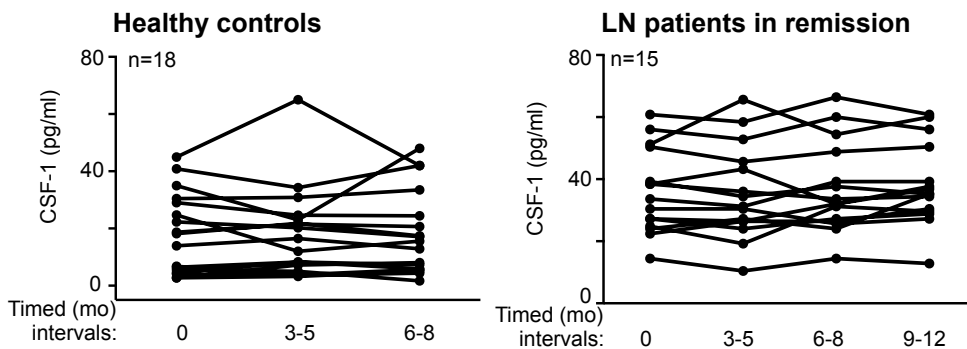

**Supplement Figure 1.** Serum and urine CSF-1 analysis is highly accurate and specific and values are reproducibly stable. (A) Nonparametric receiver operating characteristic (ROC) curve for serum and urine CSF-1 in patients with SLE (n=217) and patients with LN (n=84) versus healthy controls (n=162). (B) Serum and urine CSF-1 levels urine tracked through 1-4 cycles of freezing and thawing specimens. (C). Left panel: Serum CSF-1 levels from healthy volunteers compared initially and after 3-5 and 6-8 mo. Right panel: Serum CSF-1 levels from SLE patients in remission compared initially and after 3-5, 6-8 and 9-12 mo. Serum and urine CSF-1 levels were quantified using an ELISA.

**Supplement Table 1.  
Demographic and Clinical Characteristics in Patients with Non-inflammatory  
Kidney Disease**

|                          |                        |           |
|--------------------------|------------------------|-----------|
| Race (n)                 | White                  | 45        |
|                          | Asian                  | 0         |
|                          | Others                 | 7         |
| Sex (n)                  | Female                 | 27        |
|                          | Male                   | 25        |
| Disease type             | Nephrosclerosis        | 32        |
|                          | Amyloidosis            | 12        |
|                          | Minimal Change Disease | 10        |
| Age at diagnosis (years) | Mean                   | 48.6±2.8  |
|                          | Range                  | 24.9-74.1 |

**Supplement Table 2.  
Demographic and Clinical Characteristics in Patients with LN Flares**

|                                                   |        |             |
|---------------------------------------------------|--------|-------------|
| Race (n)                                          | White  | 12          |
|                                                   | Asian  | 0           |
|                                                   | Others | 2           |
| Sex (n)                                           | Female | 9           |
|                                                   | Male   | 5           |
| Age at SLE diagnosis (years)                      | Mean   | 32.9±2.8    |
|                                                   | Range  | 21.8-47.6   |
| Age at diagnosis of LN (years)                    | Mean   | 38.1±2.7    |
|                                                   | Range  | 23.8-50.7   |
| Age at diagnosis of flare (years)                 | Mean   | 43.6±3.1    |
|                                                   | Range  | 23.9-62.1   |
| Time from diagnosis of LN to flare (years)        | Mean   | 5.3±1.5     |
|                                                   | Range  | 0.5-14.5    |
| Overall duration of LN (years)                    | Mean   | 6.9±1.3     |
|                                                   | Range  | 1.2-15.9    |
| <b>Clinical parameter at the time of LN flare</b> |        |             |
| Creatinine (mg/dl)                                |        | 1.1±0.1     |
| Proteinuria (24h collection) >0.5g                | n      | 48          |
|                                                   | Mean   | 1.7±0.2     |
|                                                   | Range  | 1.1-3.1 g/d |
| ANA positive                                      | n      | 12          |
| anti-dsDNA positive                               | n      | 10          |
| Depressed serum C3 level                          | n      | 9           |
|                                                   | Mean   | 0.9±0.1     |
|                                                   | Range  | 0.5-1.2     |
| <b>ISN/RPS class</b>                              |        |             |
| Class II                                          | n      | 2           |
| Class III                                         | n      | 3           |
| Class IV                                          | n      | 8           |
| Class V                                           | n      | 1           |
| <b>Medication</b>                                 |        |             |
| Prednisolone                                      | n      | 12          |
| Mycophenolatmofetile                              | n      | 10          |
| Cyclophosphamide                                  | n      | 0           |
| Azathioprine                                      | n      | 2           |
| Hydroxychloroquine                                | n      | 8           |
| Angiotensin-blocking agent                        | n      | 5           |

**Supplement Table 3.**  
**Demographic and Clinical Characteristics in Patients new Onset of LN**

|                                                   |        |             |
|---------------------------------------------------|--------|-------------|
| Race (n)                                          | White  | 15          |
|                                                   | Asian  | 0           |
|                                                   | Others | 2           |
| Sex (n)                                           | Female | 12          |
|                                                   | Male   | 5           |
| Age at SLE diagnosis (years)                      | Mean   | 31±2.2      |
|                                                   | Range  | 21.8-49.3   |
| Age at diagnosis of LN (years)                    | Mean   | 37.3±2.4    |
|                                                   | Range  | 22.1-55.5   |
| Disease duration at the time of LN onset (years)  | Mean   | 5.9±1.6     |
|                                                   | Range  | 0.5-22.8    |
| <b>Clinical parameter at the time of LN onset</b> |        |             |
| Creatinine (mg/dl)                                |        | 1.0±0.1     |
| Proteinuria (24h collection) >0.5g                | n      | 17          |
|                                                   | Mean   | 2.1±0.3     |
|                                                   | Range  | 0.6-6.3 g/d |
| ANA positive                                      | n      | 16          |
| anti-dsDNA positive                               | n      | 14          |
| Depressed serum C3 level                          | n      | 11          |
|                                                   | Mean   | 0.8±0.1     |
|                                                   | Range  | 0.2-1.5     |
| <b>ISN/RPS class</b>                              |        |             |
| Class II                                          | n      | 4           |
| Class III                                         | n      | 3           |
| Class IV                                          | n      | 9           |
| Class V                                           | n      | 1           |
| <b>Medication</b>                                 |        |             |
| Prednisolone                                      | n      | 16          |
| Mycophenolatmofetile                              | n      | 12          |
| Cyclophosphamide (only as induction therapy)      | n      | 0           |
| Azathioprine                                      | n      | 2           |
| Hydroxychloroquine                                | n      | 8           |
| Angiotensin-blocking agent                        | n      | 5           |
